# Supplementary material for: Luticola tenera sp. nov. (Diadesmidaceae, Naviculales)—A New Diatom from the Soil of the State Nature Reserve “Bastak” (Jewish Autonomous Region, Russia)
Source: MDPI journal article supplement (doi:10.3390/life13091937), 2023-09-20
Supplement: s1 [file s1]

Table S1. Comparative analysis of morphological and morphometric parameters in *Luticola tenera* and morphologically similar species.

|                          | <i>L. terrestris</i>                                                         | <i>L. asymmetrica</i>                                                        | <i>L. rojkoviensis</i>                                                        | <i>L. darvinii</i>                                                  | <i>L.beyensii</i>                                            | <i>L. fuhrmannii</i>                                | <i>L. intermedia</i>             | <i>L. acidoclinata</i>           | <i>L. tenera</i><br><b>sp.nov.</b>                 |
|--------------------------|------------------------------------------------------------------------------|------------------------------------------------------------------------------|-------------------------------------------------------------------------------|---------------------------------------------------------------------|--------------------------------------------------------------|-----------------------------------------------------|----------------------------------|----------------------------------|----------------------------------------------------|
| Length, µm               | 8.0–28.5                                                                     | 12.5–36.0                                                                    | 11.7–32.0                                                                     | 18.0–28.0                                                           | 17.0–30.0                                                    | 18.0–34.0                                           | 16.0–29.9                        | 10.0–30.0                        | 15.7–35.0                                          |
| Width, µm                | 4.4–6.1                                                                      | 6.0–8.0                                                                      | 6.0–9.0                                                                       | 6.0–8.0                                                             | 6.5–9.5                                                      | 7.5–8.5                                             | 5.8–8.5                          | 5.0–8.0                          | 6.6–11.0                                           |
| Shape                    | lanceolate to rhombic-lanceolate                                             | lanceolate, elliptic–lanceolate to rhombic lanceolate                        | rhombic–lanceolate to rhombic–elliptic                                        | elliptical-lanceolate to lanceolate                                 | rhombic-lanceolate                                           | lanceolate to rhombic-elliptic                      | lanceolate to rhombic-lanceolate | rhombic–lanceolate to lanceolate | rhombic–lanceolate to elliptic–lanceolate          |
| Apices                   | usually rounded, in larger valves, slightly subcapitate, slightly protracted | usually rounded, in larger valves, slightly subcapitate, slightly protracted | slightly protracted to broadly rounded                                        | with very weakly protracted, broadly rounded ends                   | larger individuals with subcapitate ends                     | rounded, not protracted                             | rounded                          | slightly protracted              | slightly protracted to broadly rounded             |
| Stria density (in 10 µm) | radiate throughout, 20–23                                                    | radiate throughout, 17–20                                                    | radiate throughout, 18–25                                                     | radiate throughout, 20–22                                           | slightly radiate in the middle to radiate at the ends, 22–24 | radiate, 22–24                                      | radiate, 21–24                   | radiate, 21–24                   | radiate throughout, 17–23                          |
| Central area             | bow-tie-shaped, often asymmetrical, bordered by shortened striae             | bow-tie-shaped                                                               | weakly asymmetrical, wedge-shaped                                             | nd                                                                  | with a large fascia, rarely reaching the valve margins       | rectangular to bow-tie-shaped                       | nd                               | wedge-shaped                     | weakly asymmetrical, rectangular                   |
| Axial area               | linear, slightly widening towards both the central area and the apices       | linear, slightly widening towards both the central area and the apices       | narrow, linear, slightly expanded near central area and very slightly lowered | narrow, expanded at valve centre to wide, nearly-rectangular fascia | linear, relatively broad                                     | narrow, linear, weakly expanded in the central area | narrow, linear                   | narrow, linear                   | linear, slightly widening towards both the central |

|                                      |                                                                                                                    |                                                                                           |                                                                       |                                                                 |                                                                                                                           |                                                       |                                             |                                                  |                                                                |
|--------------------------------------|--------------------------------------------------------------------------------------------------------------------|-------------------------------------------------------------------------------------------|-----------------------------------------------------------------------|-----------------------------------------------------------------|---------------------------------------------------------------------------------------------------------------------------|-------------------------------------------------------|---------------------------------------------|--------------------------------------------------|----------------------------------------------------------------|
| Distal raphe ends                    | first curved to the same side as the proximal raphe fissures, then slightly bent to the isolated pore-bearing side | hooked towards opposite side, terminating shortly before valve edge                       | in the shape of a question mark up to a bayonet-shape in larger cells | long, question mark shaped, extending onto valve mantle         | curved twice, first in the same direction as the central endings (primary side) and then returning towards secondary side | hooked                                                | hooked and continuing onto the valve mantle | hooked                                           | in the shape of a question mark, extending onto valve mantle   |
| Proximal raphe ends                  | deflected away from the isolated pore-bearing side with small drop-like endings                                    | long, unilaterally deflected to the side opposite to stigma and expanded into small pores | slightly deflected to opposite side to stigma                         | double curved long fissures                                     | nd                                                                                                                        | deflected, expanded                                   | deflected, expanded into a central pore     | hooked                                           | hook-shaped, deflected to side opposite to stigma              |
| Ghost areolae                        | often present                                                                                                      | present                                                                                   | nd                                                                    | nd                                                              | nd                                                                                                                        | nd                                                    | nd                                          | nd                                               | often present                                                  |
| Number areolae bordered central area | nd                                                                                                                 | 3–5                                                                                       | 3–5                                                                   | 4–5                                                             | 3–5                                                                                                                       | 3–4                                                   | nd                                          | 3–5                                              | 3–5                                                            |
| Number striae composed areolae       | 2–4                                                                                                                | 2–5                                                                                       | 2–7                                                                   | nd                                                              | 2–4                                                                                                                       | 3–5                                                   | 4–5                                         | 3–4                                              | 3–6                                                            |
| Habitat                              | terrestrial moss collected from rock                                                                               | terrestrial moss collected from rock                                                      | rock environment is formed by the Mráznica Formation                  | floating moss                                                   | dry soils and mosses                                                                                                      | nd                                                    | nd                                          | nd                                               | terrestrial                                                    |
| Locality                             | Prince Alfreds's Pass, Knysna, Western Cape, South Africa                                                          | Prince Alfreds's Pass, Knysna, Western Cape, South Africa                                 | grassland of the hill in the village of Rojkov, Veľká Fatra, Slovakia | Ecuador. Galápagos islands: isabela (albamarle) island, diablás | Island of Saint-Paul, Amsterdam                                                                                           | Amany Ost-Usambaragebirge Korogwrtal, Tanga, Tanzania | nd                                          | Lake Tanganyica, M Pulungu, Ile Niamcolo, stone. | Soil, State Nature Reserve «Bastak», Jewish Autonomous Region, |

|        |                        |                        |                           |                    |                                  |                        |                        |                        |            |
|--------|------------------------|------------------------|---------------------------|--------------------|----------------------------------|------------------------|------------------------|------------------------|------------|
|        |                        |                        |                           | wetlands           |                                  |                        |                        |                        | Russia     |
| Source | Rybak et. al.,<br>2021 | Rybak et. al.,<br>2021 | Hindáková &<br>Noga, 2021 | Bak et al,<br>2019 | Van de<br>Vijver et<br>al., 2002 | Levkov et al.,<br>2013 | Levkov et al.,<br>2013 | Levkov et al.,<br>2013 | this study |

Notes: nd – no data.
